# Supplementary material for: Intrinsic curvature in wool fibres is determined by the relative length of orthocortical and paracortical cells
Source: Oxford University Press journal article supplement (doi:10.1242/jeb.172312), 2018-03-15
Supplement: jeb172312supp.pdf [file jeb172312supp.pdf]

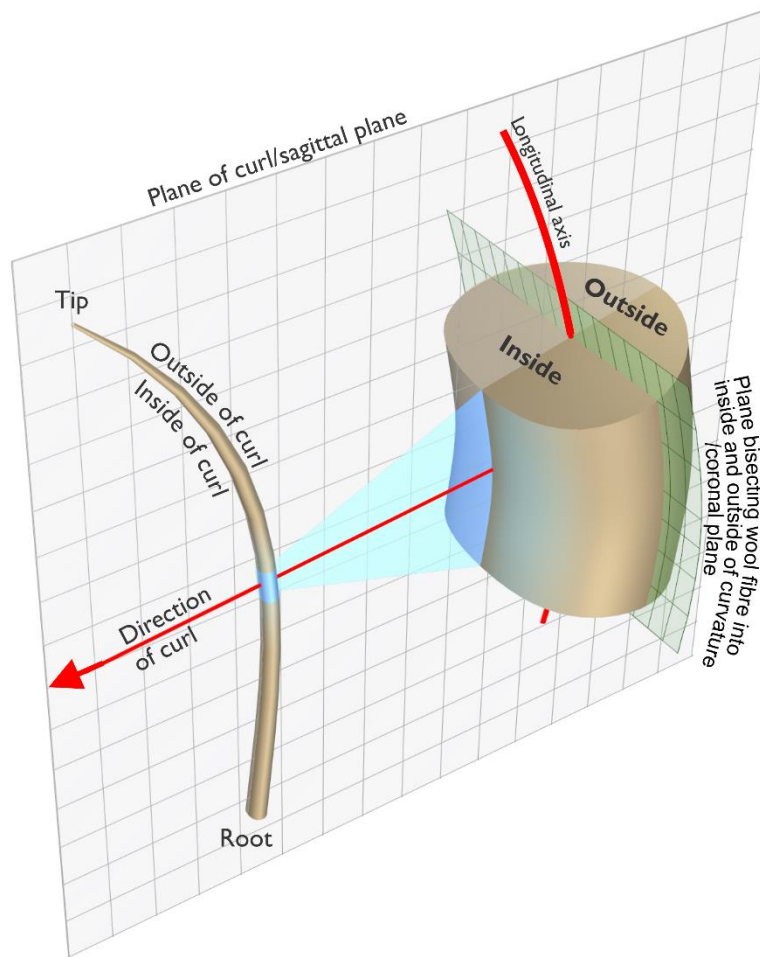

Fig. S1. Graphic definition of what is meant by inside, outside of curl and of fibre, and the direction of curl in main text.

Table S1. Sheep used in study. Body live weight measured before and after wool collection. Body condition score is an expert observer subjective score from (1 = emaciated to 5 = fat). Curvature and diameter are grand means of measurements for all snippets measured using methods described in text (fibres were chosen to maximise the range of curvatures for each sheep).

| Tag  | Body wt. (kg) |      | Body cond. score |     | Mean Curvature<br>(SD) °/mm | Mean Diameter<br>(SD) µm |
|------|---------------|------|------------------|-----|-----------------------------|--------------------------|
|      | Apr           | Oct  | Apr              | Oct |                             |                          |
| 477  | 62.8          | 65.2 | 4                | 4   | 56.8 (27.1)                 | 30.1 (3.7)               |
| 482  | 62.0          | 66.6 | 4                | 4   | 58.8 (28.5)                 | 30.7 (6.0)               |
| MR17 | 60.4          | 69.4 | 4                | 4   | 69.6 (23.1)                 | 27.0 (3.0)               |
| TB2  | 56.2          | 58.8 | 4                | 3   | 77.6 (30.8)                 | 25.6 (2.5)               |
| TA25 | 67.6          | 70.0 | 5                | 4   | 78.2 (19.0)                 | 30.9 (5.0)               |
| TB8  | 64.6          | 71.4 | 4                | 4   | 83.8 (30.9)                 | 25.7 (2.7)               |
| TB6  | 65.6          | 68.8 | 4                | 4   | 87.7 (36.9)                 | 25.7 (2.6)               |
| VL12 | 56.4          | 58.4 | 3                | 3   | 90.2 (28.0)                 | 24.7 (2.5)               |

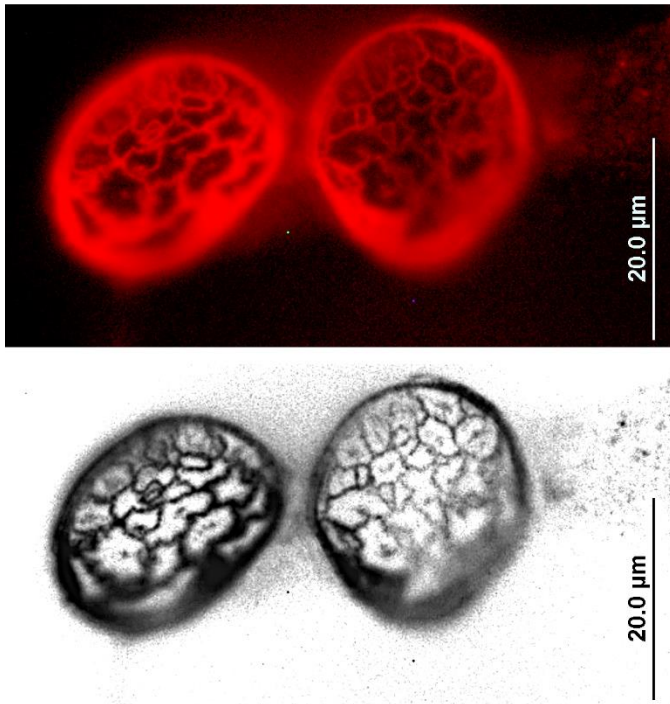

Fig. S2. Optical cross-sections from confocal microscopy of merino wool stained with cell boundary staining method taken during method development. The inverted and sharpened version in the bottom panel illustrates that cell boundaries are clearly visible throughout the fibre.

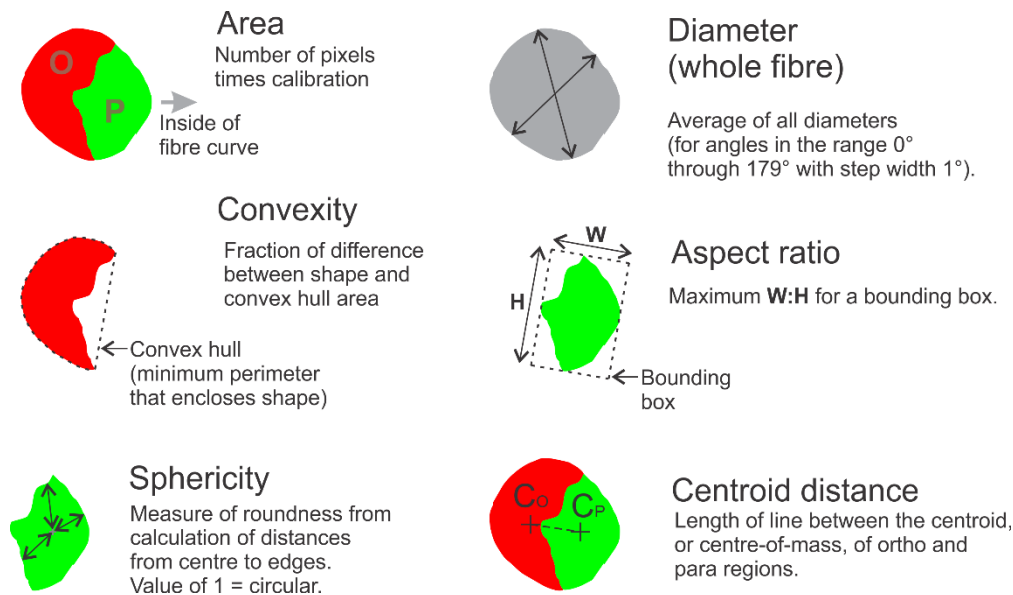

Fig. S3. Definitions of the key image analysis measurements made on segmented fibre images and fibre profiles.

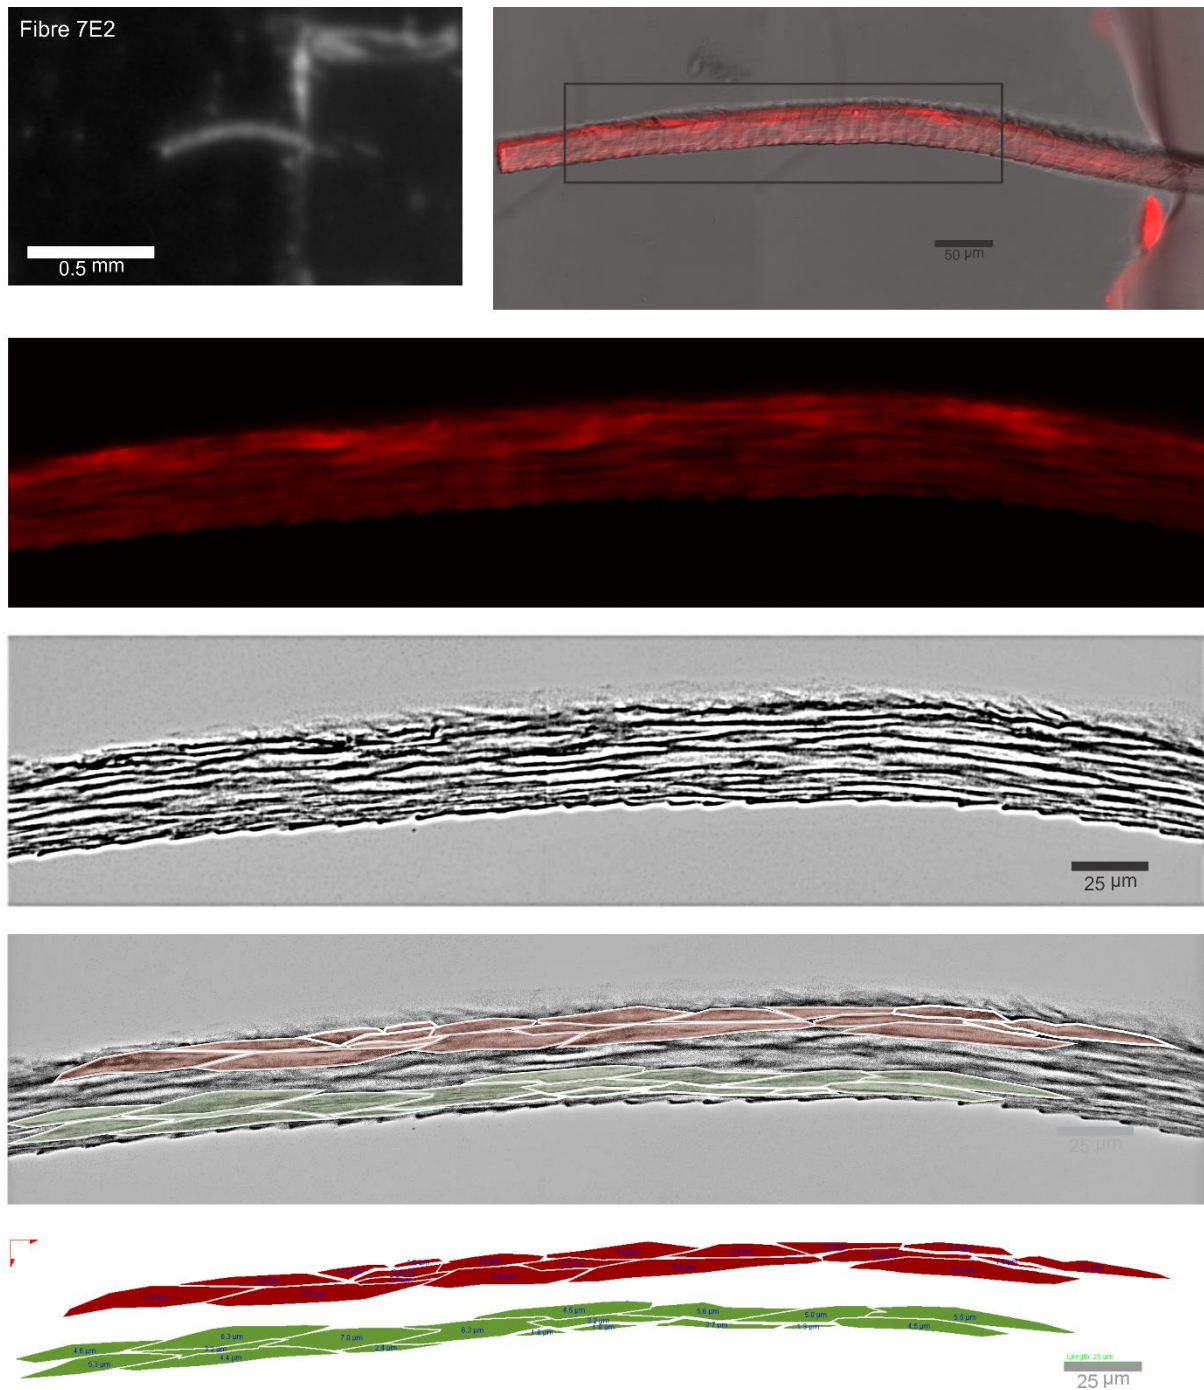

Fig. S4. Example images from preliminary work carried out to determine sampling approach. This included non-linear changes to contrast and local contrast enhancement methods. Cells taken within two cell widths from the fibre surface ensured that cell type could be determined. Centrally located cells were less easy to identify unambiguously.

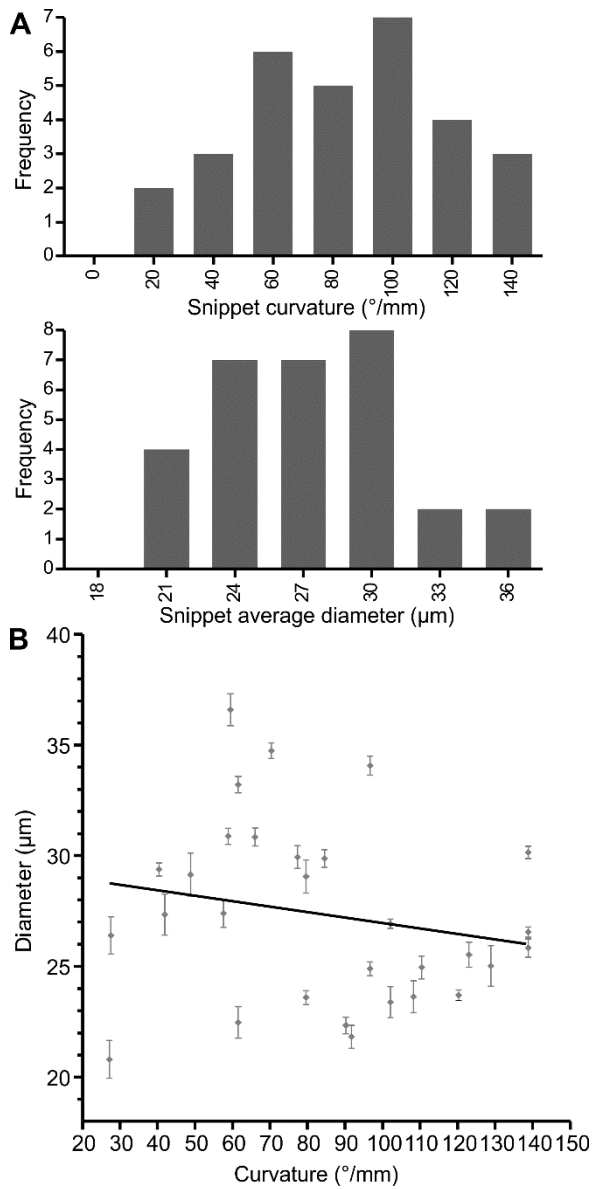

Fig. S5. Range of curvatures and diameters of snippets used in the cell-type analysis. A. distributions of curvatures and diameters. B. Diameter plotted against curvature for all snippets as means of 5 x-z sections per snippet, error bars are standard error of the mean and line is a linear regression.

Table S2. Regressions of data from orthocortex/paracortex analysis (n = 30 snippets x 5 x-z sections per snippet). CSA is cross-sectional area. NS is non-significant.

| Relationship                                                               | Linear regression (r <sup>2</sup> ) | Deviation from zero slope | Figure     |
|----------------------------------------------------------------------------|-------------------------------------|---------------------------|------------|
| Diameter and curvature                                                     | 0.04                                | NS                        | Sup.Fig.5B |
| CSA orthocortex and diameter                                               | 0.75                                | P<0.0001                  | Figure 3A  |
| CSA paracortex and diameter                                                | 0.69                                | P<0.0001                  | Figure 3A  |
| CSA orthocortex and curvature                                              | 0.00                                | NS                        | Figure 3B  |
| CSA paracortex and curvature                                               | 0.08                                | NS                        | Figure 3B  |
| Orthocortex paracortex ratio and curvature                                 | 0.02                                | NS                        | Figure 4A  |
| CSA orthocortex minus paracortex as a proportion snippet CSA and curvature | 0.06                                | NS                        | Figure 4B  |
| Distance between centres of mass of orthocortex and paracortex             | 0.01                                | NS                        | Figure 4C  |
| Distance between central points normalised by diameter of snippet          | 0.07                                | NS                        | Figure 4D  |
| Orthocortex convexity and curvature                                        | 0.10                                | NS                        | Figure 5A  |
| Paracortex convexity and curvature                                         | 0.01                                | NS                        | Figure 5A  |
| Orthocortex aspect ratio and curvature                                     | 0.01                                | NS                        | Figure 5B  |
| Paracortex aspect ratio and curvature                                      | 0.42                                | NS                        | Figure 5B  |
| Cortex aspect ratio and curvature                                          | 0.05                                | NS                        | Figure 5B  |
| Orthocortex circularity and curvature                                      | 0.01                                | NS                        | Figure 5C  |
| Paracortex circularity and curvature                                       | 0.10                                | NS                        | Figure 5C  |
| Cortex circularity and curvature                                           | 0.02                                | NS                        | Figure 5C  |

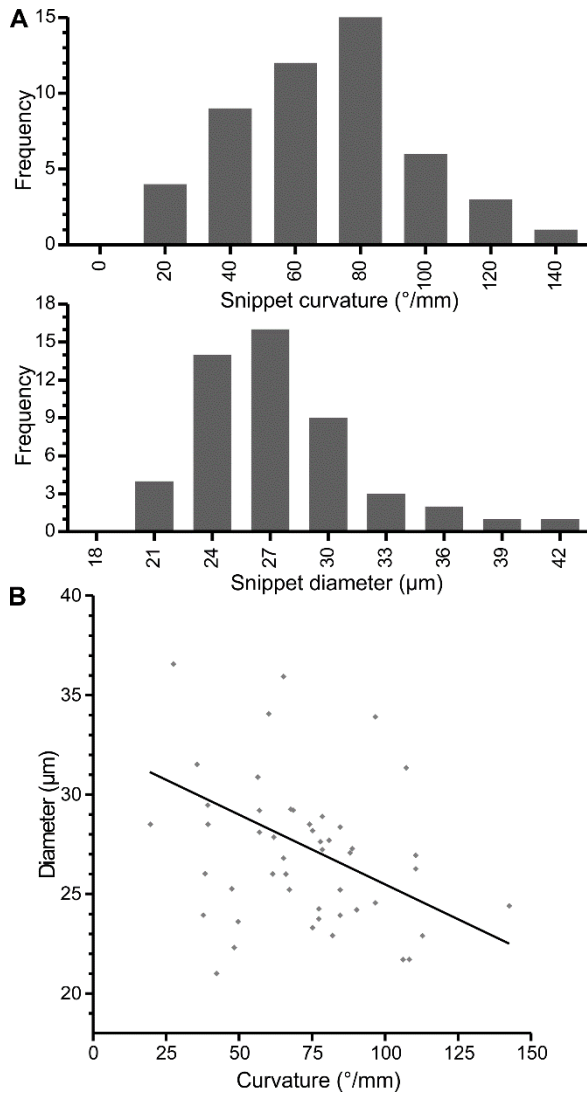

Fig. S6. Range of curvatures and diameters of snippets used in the cell-length analysis. A. distribution of curvatures and diameters. B. Diameter plotted against curvature for all snippets. The line is a linear regression.

Table S3. Regressions of data from cell length/number analysis (n = 50 snippets).

| Relationship                                                                            | Linear regression ( $r^2$ ) | Deviation from zero slope | Figure     |
|-----------------------------------------------------------------------------------------|-----------------------------|---------------------------|------------|
| Diameter and curvature                                                                  | 0.18                        | P<0.0025                  | Sup.Fig.6B |
| Outside cell length and fibre diameter                                                  | 0.14                        | P<0.01                    | Figure 7A  |
| Inside cell length and fibre diameter                                                   | 0.22                        | P<0.001                   | Figure 7A  |
| Pooled cell length and fibre diameter                                                   | 0.21                        | P<0.001                   | Figure 7A  |
| Outside cell length and fibre curvature                                                 | 0.01                        | NS                        | Figure 7B  |
| Inside cell length and fibre curvature                                                  | 0.13                        | P=0.013                   | Figure 7B  |
| Pooled cell length and fibre curvature                                                  | 0.02                        | NS                        | Figure 7B  |
| Outside to inside cell length difference and curvature                                  | 0.30                        | P<0.0001                  | Figure 7C  |
| Outside to inside cell length difference divided by fibre diameter, and fibre curvature | 0.42                        | P<0.0001                  | Figure 7D  |
| Ratio of number of cells in 250 $\mu$ m, outside:inside and fibre diameter              | 0.02                        | NS                        | Figure 8A  |
| Ratio of number of cells in 250 $\mu$ m, outside:inside and fibre curvature             | 0.23                        | P<0.001                   | Figure 8B  |
